# Supplementary material
Source: PubMed Central journal article supplement (PMC4378429)
Supplement: pnas.1423953112.sapp.pdf [file pnas.1423953112.sapp.pdf]

## SI Appendix

**Table S1:**  $\delta^{13}\text{C}$  tooth enamel values (average and standard deviation) from archaeological tooth enamel, Trench III, Gogo Falls.

| <b>Family</b>  | <b>Tribe</b> | <b>Species</b>                | <b><math>\delta^{13}\text{C}</math></b> | <b>Std. dev.</b> | <b>no. samples</b> |
|----------------|--------------|-------------------------------|-----------------------------------------|------------------|--------------------|
| Bovidae        | Bovini       | <i>Bos taurus</i>             | 1.6                                     | 1.5              | 11                 |
| Bovidae        | Alcelaphini  |                               | 1.5                                     | 1.2              | 15                 |
| Bovidae        | Hippotragini |                               | 1.2                                     | 1.4              | 5                  |
| Equidae        |              | <i>Equus sp.</i>              | 0.8                                     | 0.6              | 13                 |
| Bovidae        | Reduncini    |                               | 0.7                                     | 1.7              | 5                  |
| Hippopotamidae |              | <i>Hippopotamus amphibius</i> | 0.6                                     | 0.6              | 2                  |
| Bovidae        | unk.         |                               | 0.5                                     | 1.3              | 2                  |
| Bovidae        | Neotragini   | <i>Ourebia ourebi</i>         | 0.3                                     | 0.8              | 8                  |
| Bovidae        | Caprini      |                               | 0.2                                     | 1.4              | 14                 |
| Suidae         |              | <i>Phacochoerus sp.</i>       | -0.1                                    | 0.9              | 4                  |
| Suidae         |              | <i>Potamochoerus sp.</i>      | -3.9                                    |                  | 1                  |
| Bovidae        | Tragelaphini | <i>Taurotragus oryx</i>       | -6.6                                    | 2.8              | 5                  |
| Bovidae        | Cephalophini | <i>Sylvicapra sp.</i>         | -8.8                                    |                  | 1                  |

**Table S2:**  $\delta^{13}\text{C}_{1750}$  tooth enamel values (average and standard deviation) from modern comparative fauna from Kenya and Tanzania. \*Neotragini and *Sylvicapra* values were calculated to tooth enamel values from keratin using  $\epsilon_{\text{keratin-enamel}}$  values of 11.1‰ because of a lack of enamel values in the literature.

| Family         | Tribe        | Species                       | $\delta^{13}\text{C}$ | std. dev. ( $\pm$ ) | no. samples | Ref.      |
|----------------|--------------|-------------------------------|-----------------------|---------------------|-------------|-----------|
| Bovidae        | Bovini       | <i>Bos taurus</i>             | 2.7                   | 1.2                 | 5           | (1, 2)    |
| Bovidae        | Alcelaphini  |                               | 3.2                   | 1.5                 | 93          | (3-6)     |
| Bovidae        | Hippotragini |                               | 1.8                   | 2.1                 | 29          | (3-5)     |
| Equidae        |              | <i>Equus sp.</i>              | 2.2                   | 0.4                 | 9           | (5, 7, 8) |
| Bovidae        | Reduncini    |                               | 2.5                   | 1.4                 | 51          | (3, 4)    |
| Hippopotamidae |              | <i>Hippopotamus amphibius</i> | -2.3                  | 1.7                 | 14          | (7, 9)    |
| Bovidae        | Neotragini*  | <i>Ourebia ourebi</i>         | 1.3                   | 4.4                 | 4           | (3)       |
| Bovidae        | Caprini      |                               | -4.0                  | 3.4                 | 22          | (10)      |
| Suidae         |              | <i>Phacochoerus sp.</i>       | 1.0                   | 1.1                 | 56          | (5, 6, 9) |
| Suidae         |              | <i>Potamochoerus sp.</i>      | -6.9                  | 4.9                 | 15          | (9)       |
| Bovidae        | Tragelaphini | <i>T. oryx</i>                | -10.4                 | 2.2                 | 18          | (3, 4)    |
| Bovidae        | Cephalophini | <i>Sylvicapra sp.</i> *       | -10.6                 | 1.4                 | 9           | (3)       |

**Table S3:**  $\delta^{13}\text{C}$  and  $\delta^{18}\text{O}$  tooth enamel values from Gogo Falls fauna. Calculated %C<sub>4</sub> has been rounded to the nearest 5% to account for uncertainty in the dietary model.

| Specimen ID  | Common/<br>Species name           | Family/Sub-<br>Family | Tribe        | $\delta^{13}\text{C}$ | $\delta^{18}\text{O}$ | %C <sub>4</sub> |
|--------------|-----------------------------------|-----------------------|--------------|-----------------------|-----------------------|-----------------|
| KKC13-E-296  | <i>Bos taurus</i>                 | Bovidae               | Bovini       | -1.0                  | 1.0                   | 80              |
| KKC13-E-297  | <i>Bos taurus</i>                 | Bovidae               | Bovini       | -0.8                  | -2.7                  | 80              |
| KKC13-E-298  | <i>Bos taurus</i>                 | Bovidae               | Bovini       | 1.9                   | 1.8                   | 100             |
| KKC13-E-299  | <i>Bos taurus</i>                 | Bovidae               | Bovini       | 1.5                   | 1.2                   | 100             |
| KKC13-E-300  | <i>Bos taurus</i>                 | Bovidae               | Bovini       | 1.8                   | 0.3                   | 100             |
| KKC13-E-301  | <i>Bos taurus</i>                 | Bovidae               | Bovini       | 2.9                   | 1.7                   | 100             |
| KKC13-E-302  | <i>Bos taurus</i>                 | Bovidae               | Bovini       | 2.7                   | 2.8                   | 100             |
| KKC13-E-303  | <i>Bos taurus</i>                 | Bovidae               | Bovini       | 0.6                   | 0.5                   | 90              |
| KKC13-E-304  | <i>Bos taurus</i>                 | Bovidae               | Bovini       | 3.4                   | 2.3                   | 100             |
| KKC13-E-305  | <i>Bos taurus</i>                 | Bovidae               | Bovini       | 3.2                   | 2.1                   | 100             |
| KKC13-E-306  | <i>Bos taurus</i>                 | Bovidae               | Bovini       | 1.3                   | 2.5                   | 95              |
| KKC13-E-307  | <i>Bos taurus</i>                 | Bovidae               | Bovini       | 1.8                   | 0.7                   | 100             |
| KKC13-E-342  |                                   | Bovidae               | Alcelaphini  | 0.2                   | 1.4                   | 90              |
| KKC13-E-343  |                                   | Bovidae               | Alcelaphini  | 0.1                   | 1.5                   | 90              |
| KKC13-E-345  |                                   | Bovidae               | Alcelaphini  | 3.2                   | 2.4                   | 100             |
| KKC13-E-350  |                                   | Bovidae               | Alcelaphini  | -0.4                  | -0.4                  | 85              |
| KKC13-E-351  |                                   | Bovidae               | Alcelaphini  | 1.3                   | 0.3                   | 95              |
| KKC13-E-352  |                                   | Bovidae               | Alcelaphini  | 3.0                   | 1.9                   | 100             |
| KKC13-E-353  |                                   | Bovidae               | Alcelaphini  | 0.6                   | 0.1                   | 90              |
| KKC13-E-354  | <i>Damaliscus spp.</i>            | Bovidae               | Alcelaphini  | 2.7                   | 1.5                   | 100             |
| KKC13-E-355  | <i>Damaliscus spp.</i>            | Bovidae               | Alcelaphini  | 3.0                   | 1.9                   | 100             |
| KKC13-E-356  | topi/hartebeest                   | Bovidae               | Alcelaphini  | 2.1                   | -2.1                  | 100             |
| KKC13-E-357  | <i>Damaliscus spp.</i>            | Bovidae               | Alcelaphini  | 0.6                   | -0.3                  | 90              |
| KKC13-E-358  | <i>Damaliscus spp.</i>            | Bovidae               | Alcelaphini  | 2.2                   | 1.3                   | 100             |
| KKC13-E-346* | <i>Alcelaphus/<br/>Damaliscus</i> | Bovidae               | Alcelaphini  | 0.0                   | -0.3                  | 85              |
| KKC13-E-348* |                                   | Bovidae               | Alcelaphini  | 2.2                   | 1.3                   | 100             |
| KKC13-E-377  | topi/hartebeest                   | Bovidae               | Alcelaphini  | 0.3                   | 1.1                   | 90              |
| KKC13-E-349  | roan/sable                        | Bovidae               | Hippotragini | -0.6                  | -2.7                  | 85              |
| KKC13-E-373  | roan/sable                        | Bovidae               | Hippotragini | 1.4                   | -2.1                  | 100             |
| KKC13-E-376  | roan/sable                        | Bovidae               | Hippotragini | 2.3                   | 0.4                   | 100             |
| KKC13-E-372* | roan                              | Bovidae               | Hippotragini | 2.7                   | 0.2                   | 100             |
| KKC13-E-374* | roan/sable                        | Bovidae               | Hippotragini | 0.9                   | 2.4                   | 95              |
| KKC13-E-317  | <i>Equus burchelli</i>            | Equidae               |              | 1.5                   | 1.9                   | 100             |
| KKC13-E-318  | <i>Equus burchelli</i>            | Equidae               |              | 2.0                   | 1.4                   | 100             |
| KKC13-E-319  | <i>Equus burchelli</i>            | Equidae               |              | 1.3                   | 0.0                   | 100             |
| KKC13-E-320  | <i>Equus burchelli</i>            | Equidae               |              | 0.8                   | 1.3                   | 95              |

| Specimen ID  | Common/<br>Species name | Family/Sub-<br>Family | Tribe      | $\delta^{13}\text{C}$ | $\delta^{18}\text{O}$ | %C4 |
|--------------|-------------------------|-----------------------|------------|-----------------------|-----------------------|-----|
| KKC13-E-315  | <i>Equus spp.</i>       | Equidae               |            | 0.1                   | 1.0                   | 90  |
| KKC13-E-316  | <i>Equus spp.</i>       | Equidae               |            | 1.6                   | 2.4                   | 100 |
| KKC13-E-321  | <i>Equus spp.</i>       | Equidae               |            | 0.6                   | 1.2                   | 90  |
| KKC13-E-323  | <i>Equus spp.</i>       | Equidae               |            | 0.5                   | -0.4                  | 90  |
| KKC13-E-324  | <i>Equus spp.</i>       | Equidae               |            | 0.0                   | -0.3                  | 90  |
| KKC13-E-312* | <i>Equus spp.</i>       | Equidae               |            | 0.1                   | 1.4                   | 90  |
| KKC13-E-314* | <i>Equus spp.</i>       | Equidae               |            | 0.0                   | 0.6                   | 90  |
| KKC13-E-367  | kob/waterbuck           | Bovidae               | Reduncini  | 2.8                   | 0.9                   | 100 |
| KKC13-E-378  | kob/waterbuck           | Bovidae               | Reduncini  | 2.3                   | 1.3                   | 100 |
| KKC13-E-368* |                         | Bovidae               | Reduncini  | -0.4                  | -0.3                  | 85  |
| KKC13-E-370* |                         | Bovidae               | Reduncini  | -1.0                  | -0.2                  | 80  |
| KKC13-E-371* |                         | Bovidae               | Reduncini  | 1.0                   | -2.6                  | 95  |
| KKC13-E-330  | <i>H. amphibius</i>     | Hippopotamidae        |            | 0.2                   | -2.6                  | 90  |
| KKC13-E-331  | <i>H. amphibius</i>     | Hippopotamidae        |            | -0.5                  | 0.7                   | 85  |
| KKC13-E-309* | unk                     | Bovidae               |            | 1.4                   | 0.8                   | 100 |
| KKC13-E-347  | unk                     | Bovidae               |            | 1.0                   | 0.7                   | 95  |
| KKC13-E-333  | <i>Ourebia ourebi</i>   | Bovidae               | Neotragini | 0.0                   | -1.1                  | 95  |
| KKC13-E-334  | <i>Ourebia ourebi</i>   | Bovidae               | Neotragini | 0.9                   | -3.0                  | 94  |
| KKC13-E-335  | <i>Ourebia ourebi</i>   | Bovidae               | Neotragini | -0.6                  | 0.9                   | 85  |
| KKC13-E-336  | <i>Ourebia ourebi</i>   | Bovidae               | Neotragini | -0.9                  | 2.1                   | 80  |
| KKC13-E-337  | <i>Ourebia ourebi</i>   | Bovidae               | Neotragini | -0.3                  | 1.9                   | 85  |
| KKC13-E-338  | <i>Ourebia ourebi</i>   | Bovidae               | Neotragini | 1.2                   | 0.5                   | 95  |
| KKC13-E-339  | <i>Ourebia ourebi</i>   | Bovidae               | Neotragini | 0.9                   | 0.8                   | 95  |
| KKC13-E-340  | <i>Ourebia ourebi</i>   | Bovidae               | Neotragini | 0.9                   | 0.7                   | 95  |
| KKC13-E-283* | goat/sheep              | Caprinae              |            | -0.4                  | 1.9                   | 85  |
| KKC13-E-280  | goat/sheep              | Caprinae              |            | 2.2                   | 3.0                   | 100 |
| KKC13-E-281  | goat/sheep              | Caprinae              |            | 0.2                   | 1.9                   | 90  |
| KKC13-E-282  | goat/sheep              | Caprinae              |            | -2.0                  | 1.6                   | 75  |
| KKC13-E-284  | goat/sheep              | Caprinae              |            | -0.8                  | 3.2                   | 80  |
| KKC13-E-285  | goat/sheep              | Caprinae              |            | 0.5                   | 4.3                   | 90  |
| KKC13-E-288  | goat/sheep              | Caprinae              |            | 1.7                   | 1.3                   | 100 |
| KKC13-E-289  | goat/sheep              | Caprinae              |            | -0.7                  | -2.8                  | 80  |
| KKC13-E-290  | goat/sheep              | Caprinae              |            | 0.5                   | 3.8                   | 90  |
| KKC13-E-291  | goat/sheep              | Caprinae              |            | -2.1                  | -0.6                  | 70  |
| KKC13-E-292  | goat/sheep              | Caprinae              |            | 2.6                   | 2.9                   | 100 |
| KKC13-E-293  | goat/sheep              | Caprinae              |            | 0.7                   | 1.6                   | 90  |
| KKC13-E-286* | goat/sheep              | Caprinae              |            | 0.3                   | 3.3                   | 90  |
| KKC13-E-287* | goat/sheep              | Caprinae              |            | -1.2                  | -1.9                  | 80  |
| KKC13-E-326  | <i>Phacochoerus sp.</i> | Suidae                |            | 0.7                   | 1.4                   | 90  |
| KKC13-E-327  | <i>Phacochoerus sp.</i> | Suidae                |            | 0.4                   | 1.7                   | 90  |
| KKC13-E-328  | <i>Phacochoerus sp.</i> | Suidae                |            | -0.3                  | -0.2                  | 85  |

| <b>Specimen ID</b> | <b>Common/<br/>Species name</b>    | <b>Family/Sub-<br/>Family</b> | <b>Tribe</b> | <b><math>\delta^{13}\text{C}</math></b> | <b><math>\delta^{18}\text{O}</math></b> | <b>%C4</b> |
|--------------------|------------------------------------|-------------------------------|--------------|-----------------------------------------|-----------------------------------------|------------|
| KKC13-E-332        | <i>Potamochoerus</i><br><i>sp.</i> | Suidae                        |              | -5.8                                    | 2.3                                     | 45         |
| KKC13-E-360        | <i>Taurotragus oryx</i>            | Bovidae                       | Tragelaphini | -9.6                                    | -0.8                                    | 20         |
| KKC13-E-363        | <i>Taurotragus oryx</i>            | Bovidae                       | Tragelaphini | -3.9                                    | 0.0                                     | 60         |
| KKC13-E-364        | <i>Taurotragus oryx</i>            | Bovidae                       | Tragelaphini | -4.1                                    | 1.2                                     | 60         |
| KKC13-E-361*       | <i>Taurotragus oryx</i>            | Bovidae                       | Tragelaphini | -9.6                                    | 2.0                                     | 20         |
| KKC13-E-362*       | <i>Sylvicapra sp.</i>              | Bovidae                       | Cephalophini | -8.8                                    | -1.1                                    | 25         |

\*sample was run untreated due to low sample volume

**Table S4:** Modern caprine  $\delta^{13}\text{C}_{1750}$  tooth enamel data.

| <b>Common/Species name</b> | <b>Locality</b>     | <b><math>\delta^{13}\text{C}_{1750}</math></b> | <b>Citation</b> |
|----------------------------|---------------------|------------------------------------------------|-----------------|
| sheep                      | Naivasha Basin      | 0.1                                            | (10)            |
| sheep                      | Naivasha Basin      | 0.3                                            | (10)            |
| sheep                      | Naivasha Basin      | -0.9                                           | (10)            |
| sheep                      | Naivasha Basin      | 0.2                                            | (10)            |
| sheep                      | Naivasha Basin      | -0.6                                           | (10)            |
| sheep                      | Naivasha Basin      | -1.5                                           | (10)            |
| sheep                      | Central Rift valley | -0.7                                           | (2)             |
| sheep                      | Central Rift valley | -0.4                                           | (2)             |
| goat                       | Baragoi             | -7.9                                           | this study      |
| goat                       | Baringo             | -10.2                                          | this study      |
| goat                       | Borana Maua         | -10.7                                          | this study      |
| goat                       | Ciakariga           | -10.9                                          | this study      |
| goat                       | Emuhaya             | -10                                            | this study      |
| goat                       | Kainauk             | -8.5                                           | this study      |
| goat                       | Kibwezi             | -6.3                                           | this study      |
| goat                       | Kilungu             | -9.7                                           | this study      |
| goat                       | Kilungu             | -10.1                                          | this study      |
| goat                       | Kimende             | -4.7                                           | this study      |
| goat                       | Lamu                | -12.3                                          | this study      |
| goat                       | Lodwar              | -3.5                                           | this study      |
| goat                       | Loyangalani         | -9.5                                           | this study      |
| goat                       | Maimanti            | -9.7                                           | this study      |
| goat                       | Malaral             | -4.1                                           | this study      |
| goat                       | Mandera             | -5.6                                           | this study      |
| goat                       | Marimanti           | -11.7                                          | this study      |
| goat                       | Matiiri             | -6                                             | this study      |
| goat                       | Maua                | -9.5                                           | this study      |
| goat                       | Mericho             | -3.6                                           | this study      |
| goat                       | Nanyuki             | -6.3                                           | this study      |
| goat                       | Nariokotome         | -5.4                                           | this study      |
| goat                       | Ndaragwa            | -3.5                                           | this study      |
| goat                       | South Horr          | -10.3                                          | this study      |
| goat                       | Suguta Malmar       | -4.4                                           | this study      |
| goat                       | Tharaka             | -11.2                                          | this study      |
| goat                       | Tunyai              | -11.6                                          | this study      |
| goat                       | Naivasha Basin      | -6.3                                           | (10)            |
| goat                       | Naivasha Basin      | -7.4                                           | (10)            |
| goat                       | Naivasha Basin      | -7.2                                           | (10)            |
| goat                       | Naivasha Basin      | -6.1                                           | (10)            |
| goat                       | Naivasha Basin      | -6.5                                           | (10)            |

| <b>Common/Species name</b> | <b>Locality</b> | <b><math>\delta^{13}\text{C}_{1750}</math></b> | <b>Citation</b> |
|----------------------------|-----------------|------------------------------------------------|-----------------|
| goat                       | Naivasha Basin  | -5.9                                           | (10)            |
| goat                       | Naivasha Basin  | -3.4                                           | (10)            |
| goat                       | Naivasha Basin  | -2.6                                           | (10)            |
| goat                       | Naivasha Basin  | -8.5                                           | (10)            |

**Table S5:** Comparison of wild vs. domestic fauna at Neolithic sites in Kenya

| <b>Site</b>          | <b>Tradition</b> | <b>wild %</b> | <b>domestic</b> | <b>N (NISP)</b> | <b>Ref.</b> |
|----------------------|------------------|---------------|-----------------|-----------------|-------------|
| Narosura             | SPN*             | 7             | 93              | 1215            | (11)        |
| Crescent Island Main | SPN              | 18            | 82              | 526             | (11)        |
| Prolonged Drift      | SPN              | 79.9          | 20.1            | 1491            | (12)        |
| Ngamuriak            | Elmenteitan      | 0.5           | 99.56           | 4653            | (13, 14)    |
| Sugenya              | Elmenteitan      | 1.9           | 98.1            | 1774            | (15)        |
| Olderotua            | Elmenteitan      | 1.6           | 98.4            | 2127            | (15)        |
| Maasai Gorge         | Elmenteitan      | 4.3           | 96.7            | 115             | (11)        |
| Gogo Falls           | Elmenteitan      | 46.5          | 53.5            | 612             | (16)        |
| Wadh Lango 140-160   | Elmenteitan      | 10.9          | 89.1            | 156             | (17)        |
| Wadh Lango 160-190   | Elmenteitan      | 10            | 90              | 88              | (17)        |

\*SPN = *Savanna Pastoral Neolithic*



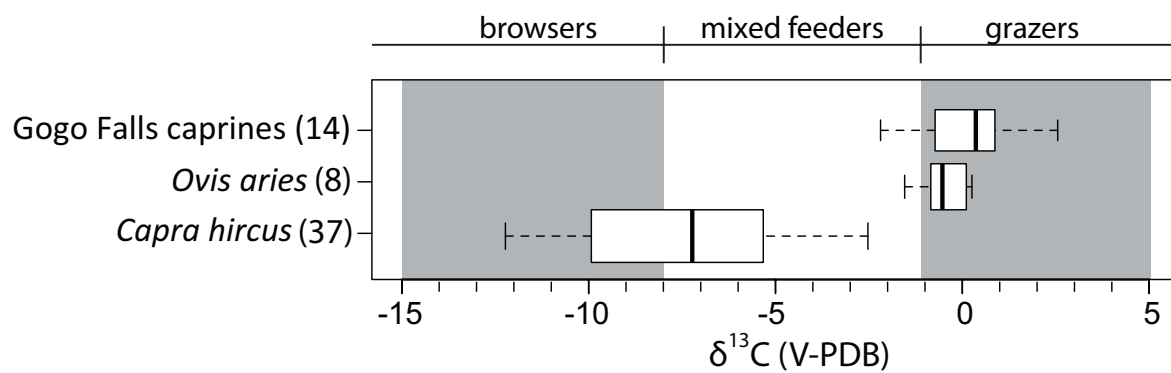

**Figure S1:** Boxplots of  $\delta^{13}\text{C}_{1750}$  tooth enamel values of modern goat, *Capra hircus* (Table S4), modern sheep, *Ovis aries* (Table S4), and Gogo Falls caprines (Table S3).

## SI References

1. Cerling TE, Harris JM, Leakey M, Mudida N (2003) Stable isotope ecology of northern Kenya with emphasis on the Turkana Basin. *Lothagam: The Dawn of Humanity in Eastern Africa*, eds Leakey MG, Harris JM (Columbia University Press, New York), pp.583–603.
2. Balasse M, Ambrose SH (2005) Mobilité altitudinale des pasteurs néolithiques dans la vallée du Rift (Kenya) : premiers indices de l'analyse du  $\delta^{13}\text{C}$  de l'émail dentaire du cheptel domestique. *Anthropozoologica* 40(1):147–166.
3. Cerling TE, Harris JM, Passey BH (2003) Diets of East African Bovidae based on stable isotope analysis. *Journal of Mammalogy* 84(2):456–470.
4. Van Der Merwe NJ (2013) Isotopic ecology of fossil fauna from Olduvai Gorge at ca 1.8 Ma, compared with modern fauna. *South African Journal of Science* 109(11/12):1-14.
5. Bocherens H, Koch PL, Mariotti A, Geraads D, Jaeger JJ (1996) Isotopic biogeochemistry ( $^{13}\text{C}$ ,  $^{18}\text{O}$ ) of mammalian enamel from African Pleistocene hominid sites. *PALAIOS* 11(4):306–318.
6. Kingston JD (2011), Stable isotopic analyses of Laetoli herbivores, *Paleontology and Geology of Laetoli: Human Evolution in Context. Volume 1: Geology, Geochronology, Paleoecology and Paleoenvironment*, ed Harrison T (Springer Netherlands, Dordrecht), pp 293–328.
7. Cerling TE et al. (2011) Diet of *Paranthropus boisei* in the Early Pleistocene of East Africa. *Proceedings of the National Academy of Science* 108(23):9337-9341.
8. Kingston JD, Harrison T (2007) Isotopic dietary reconstructions of Pliocene herbivores at Laetoli: implications for early hominin paleoecology. *Palaeogeography, Palaeoclimatology, Palaeoecology* 243(3-4):272–306.
9. Cerling TE, Harris JM (2002) Dietary adaptations of extant and Neogene African suids. *Journal of Zoology* 256(1):45–54.
10. Balasse M, Ambrose SH (2005) Distinguishing sheep and goats using dental morphology and stable carbon isotopes in  $\text{C}_4$  grassland environments. *Journal of Archaeological Science* 32(5):691-702.
11. Gifford-Gonzalez DP (1998) Early pastoralists in East Africa: Ecological and social dimensions. *Journal of Anthropological Archaeology* 17(2):166–200.
12. Gifford-Gonzalez DP, Isaac GL, Nelson CM (1980) Evidence for predation and pastoralism at Prolonged Drift: a Pastoral Neolithic site in Kenya. *Azania* 15(1):57-108.
13. Marshall F (1990) Origins of specialized pastoral production in East Africa.

*American Anthropologist* 92(4):873–894.

14. Marshall F, Grillo K, Arco L (2011) Prehistoric pastoralists and social responses to climatic risk in East Africa. *Sustainable Lifeways: Cultural Persistence in an Ever-changing Environment*, eds. Miller NF, Moore KM, Ryan K (University of Pennsylvania Press, Philadelphia), pp 74-105.
15. Simons A (2004) The development of early pastoral societies in south-western Kenya: A study of the faunal assemblages from Sugunya and Oldorotua 1 (La Trobe University, Melbourne). Ph.D. dissertation.
16. Marshall F, Stewart K (1994) Hunting, fishing and herding pastoralists of western Kenya: the fauna from Gogo Falls. *Archaeozoologia* 7(1):7-27.
17. Prendergast ME (2010) Kanyore fisher-foragers and transitions to food production in East Africa: The view from Wadh Lang'o, Nyanza Province, Western Kenya. *Azania* 45(1):83–111.
